# Supplementary material for: Gateway synthesis of daphnane congeners and their protein kinase C affinities and cell-growth activities
Source: Springer Nature journal article supplement (doi:10.1038/nchem.1074), 2011-06-17
Supplement: 41557_2011_BFnchem1074_MOESM21_ESM.mol [file 41557_2011_BFnchem1074_MOESM21_ESM.mol]

  ChemDraw06031108312D

 51 57  0  0  0  0  0  0  0  0999 V2000
   -3.1541    0.6207    0.0000 C   0  0  0  0  0  0  0  0  0  0  0  0
   -2.9238   -0.1744    0.0000 C   0  0  0  0  0  0  0  0  0  0  0  0
   -2.0965   -0.2012    0.0000 C   0  0  0  0  0  0  0  0  0  0  0  0
   -1.8154    0.5775    0.0000 C   0  0  0  0  0  0  0  0  0  0  0  0
   -2.4690    1.0854    0.0000 C   0  0  0  0  0  0  0  0  0  0  0  0
   -1.6630   -0.9064    0.0000 C   0  0  0  0  0  0  0  0  0  0  0  0
   -0.8413   -1.0071    0.0000 C   0  0  0  0  0  0  0  0  0  0  0  0
   -0.2503   -0.4276    0.0000 C   0  0  0  0  0  0  0  0  0  0  0  0
   -1.0211    0.8075    0.0000 C   0  0  0  0  0  0  0  0  0  0  0  0
    0.3647    0.7844    0.0000 C   0  0  0  0  0  0  0  0  0  0  0  0
    0.3780    1.5844    0.0000 C   0  0  0  0  0  0  0  0  0  0  0  0
   -0.3082    1.9960    0.0000 C   0  0  0  0  0  0  0  0  0  0  0  0
   -1.0077    1.6076    0.0000 C   0  0  0  0  0  0  0  0  0  0  0  0
   -3.9301    0.9008    0.0000 C   0  0  0  0  0  0  0  0  0  0  0  0
   -2.4959   -0.9262    0.0000 O   0  0  0  0  0  0  0  0  0  0  0  0
   -1.8611   -1.7101    0.0000 Br  0  0  0  0  0  0  0  0  0  0  0  0
   -3.4300   -0.8259    0.0000 C   0  0  0  0  0  0  0  0  0  0  0  0
   -1.6601    1.3877    0.0000 H   0  0  0  0  0  0  0  0  0  0  0  0
   -1.0045   -0.0201    0.0000 O   0  0  0  0  0  0  0  0  0  0  0  0
   -0.5765   -1.7885    0.0000 C   0  0  0  0  0  0  0  0  0  0  0  0
    0.9816    2.1099    0.0000 O   0  0  0  0  0  0  0  0  0  0  0  0
    0.6683    2.8462    0.0000 C   0  0  0  0  0  0  0  0  0  0  0  0
   -0.1298    2.8302    0.0000 O   0  0  0  0  0  0  0  0  0  0  0  0
   -1.7152    2.0319    0.0000 C   0  0  0  0  0  0  0  0  0  0  0  0
   -1.7318    2.8595    0.0000 C   0  0  0  0  0  0  0  0  0  0  0  0
    0.6517    3.6738    0.0000 C   0  0  0  0  0  0  0  0  0  0  0  0
    1.3768    3.2744    0.0000 C   0  0  0  0  0  0  0  0  0  0  0  0
   -0.3349    0.3959    0.0000 C   0  0  0  0  0  0  0  0  0  0  0  0
    0.2325   -1.9498    0.0000 O   0  0  0  0  0  0  0  0  0  0  0  0
    0.4974   -2.7311    0.0000 Si  0  0  0  0  0  0  0  0  0  0  0  0
    1.3064   -2.8925    0.0000 C   0  0  0  0  0  0  0  0  0  0  0  0
   -0.2840   -2.9960    0.0000 C   0  0  0  0  0  0  0  0  0  0  0  0
    0.3360   -3.5402    0.0000 C   0  0  0  0  0  0  0  0  0  0  0  0
    1.8507   -2.2725    0.0000 C   0  0  0  0  0  0  0  0  0  0  0  0
    2.1155   -3.0538    0.0000 C   0  0  0  0  0  0  0  0  0  0  0  0
    1.5712   -3.6738    0.0000 C   0  0  0  0  0  0  0  0  0  0  0  0
    1.0722    0.3600    0.0000 O   0  0  0  0  0  0  0  0  0  0  0  0
    2.5011    0.3600    0.0000 C   0  0  0  0  0  0  0  0  0  0  0  0
    2.5011   -0.4650    0.0000 C   0  0  0  0  0  0  0  0  0  0  0  0
    3.2156   -0.8775    0.0000 C   0  0  0  0  0  0  0  0  0  0  0  0
    3.9301   -0.4650    0.0000 C   0  0  0  0  0  0  0  0  0  0  0  0
    3.9301    0.3600    0.0000 C   0  0  0  0  0  0  0  0  0  0  0  0
    3.2156    0.7725    0.0000 C   0  0  0  0  0  0  0  0  0  0  0  0
    1.7867    0.7725    0.0000 C   0  0  0  0  0  0  0  0  0  0  0  0
   -3.1190   -1.5900    0.0000 C   0  0  0  0  0  0  0  0  0  0  0  0
   -3.6252   -2.2414    0.0000 C   0  0  0  0  0  0  0  0  0  0  0  0
   -3.3141   -3.0056    0.0000 C   0  0  0  0  0  0  0  0  0  0  0  0
   -2.4968   -3.1182    0.0000 C   0  0  0  0  0  0  0  0  0  0  0  0
   -1.9906   -2.4668    0.0000 C   0  0  0  0  0  0  0  0  0  0  0  0
   -2.3017   -1.7027    0.0000 C   0  0  0  0  0  0  0  0  0  0  0  0
    0.4218   -0.1123    0.0000 H   0  0  0  0  0  0  0  0  0  0  0  0
  1  2  1  0      
  2  3  1  0      
  3  4  1  0      
  4  5  1  0      
  5  1  1  0      
  3  6  1  0      
  6  7  1  0      
  7  8  1  0      
  8 28  1  0      
 28  9  1  0      
  9  4  1  0      
 28 10  1  0      
 10 11  1  0      
 11 12  1  0      
 12 13  1  0      
 13  9  1  0      
  1 14  1  1      
  3 15  1  1      
  6 16  1  1      
  2 17  2  0      
  4 18  1  6      
  9 19  1  6      
  7 19  1  6      
  7 20  1  0      
 20 29  1  0      
 21 22  1  0      
 22 23  1  0      
 12 23  1  1      
 11 21  1  6      
 10 37  1  6      
 13 24  1  6      
 24 25  2  0      
 22 26  1  0      
 22 27  1  0      
 17 45  1  0      
 29 30  1  0      
 30 31  1  0      
 30 32  1  0      
 30 33  1  0      
 31 34  1  0      
 31 35  1  0      
 31 36  1  0      
 37 44  1  0      
 38 39  2  0      
 39 40  1  0      
 40 41  2  0      
 41 42  1  0      
 42 43  2  0      
 38 43  1  0      
 38 44  1  0      
 45 46  2  0      
 46 47  1  0      
 47 48  2  0      
 48 49  1  0      
 49 50  2  0      
 45 50  1  0      
 28 51  1  1      
M  END
