# Supplementary material for: Gateway synthesis of daphnane congeners and their protein kinase C affinities and cell-growth activities
Source: Springer Nature journal article supplement (doi:10.1038/nchem.1074), 2011-06-17
Supplement: 41557_2011_BFnchem1074_MOESM36_ESM.mol [file 41557_2011_BFnchem1074_MOESM36_ESM.mol]

  ChemDraw06031119152D

 49 53  0  0  0  0  0  0  0  0999 V2000
   -0.5149    1.5394    0.0000 C   0  0  0  0  0  0  0  0  0  0  0  0
   -0.5149    0.7116    0.0000 C   0  0  0  0  0  0  0  0  0  0  0  0
    0.9189    0.7116    0.0000 C   0  0  0  0  0  0  0  0  0  0  0  0
    0.9189    1.5394    0.0000 C   0  0  0  0  0  0  0  0  0  0  0  0
    0.2020    1.9533    0.0000 C   0  0  0  0  0  0  0  0  0  0  0  0
   -1.2854    0.4092    0.0000 C   0  0  0  0  0  0  0  0  0  0  0  0
   -1.5294   -0.3818    0.0000 C   0  0  0  0  0  0  0  0  0  0  0  0
   -1.0631   -1.0658    0.0000 C   0  0  0  0  0  0  0  0  0  0  0  0
   -0.2377   -1.1276    0.0000 C   0  0  0  0  0  0  0  0  0  0  0  0
    0.3254   -0.5208    0.0000 C   0  0  0  0  0  0  0  0  0  0  0  0
   -0.5149   -0.1162    0.0000 O   0  0  0  0  0  0  0  0  0  0  0  0
   -1.2293    1.9519    0.0000 C   0  0  0  0  0  0  0  0  0  0  0  0
   -1.2293    2.7797    0.0000 C   0  0  0  0  0  0  0  0  0  0  0  0
    0.0638   -1.8956    0.0000 C   0  0  0  0  0  0  0  0  0  0  0  0
    1.5341    2.0933    0.0000 O   0  0  0  0  0  0  0  0  0  0  0  0
    1.1974    2.8495    0.0000 C   0  0  0  0  0  0  0  0  0  0  0  0
    0.3741    2.7630    0.0000 O   0  0  0  0  0  0  0  0  0  0  0  0
    1.1974    3.6773    0.0000 C   0  0  0  0  0  0  0  0  0  0  0  0
    1.9142    3.2634    0.0000 C   0  0  0  0  0  0  0  0  0  0  0  0
   -0.8847    1.1302    0.0000 O   0  0  0  0  0  0  0  0  0  0  0  0
    0.2020    0.2977    0.0000 C   0  0  0  0  0  0  0  0  0  0  0  0
   -1.6993    1.1261    0.0000 C   0  0  0  0  0  0  0  0  0  0  0  0
   -2.5242    1.1261    0.0000 C   0  0  0  0  0  0  0  0  0  0  0  0
   -2.9367    1.8405    0.0000 C   0  0  0  0  0  0  0  0  0  0  0  0
    1.6334    0.2991    0.0000 O   0  0  0  0  0  0  0  0  0  0  0  0
    3.0622    0.2991    0.0000 C   0  0  0  0  0  0  0  0  0  0  0  0
    3.0622   -0.5258    0.0000 C   0  0  0  0  0  0  0  0  0  0  0  0
    3.7765   -0.9383    0.0000 C   0  0  0  0  0  0  0  0  0  0  0  0
    4.4909   -0.5258    0.0000 C   0  0  0  0  0  0  0  0  0  0  0  0
    4.4909    0.2991    0.0000 C   0  0  0  0  0  0  0  0  0  0  0  0
    3.7765    0.7116    0.0000 C   0  0  0  0  0  0  0  0  0  0  0  0
    2.3478    0.7116    0.0000 C   0  0  0  0  0  0  0  0  0  0  0  0
    0.8795   -2.0186    0.0000 O   0  0  0  0  0  0  0  0  0  0  0  0
    1.1809   -2.7865    0.0000 Si  0  0  0  0  0  0  0  0  0  0  0  0
    1.9966   -2.9094    0.0000 C   0  0  0  0  0  0  0  0  0  0  0  0
    0.4130   -3.0878    0.0000 C   0  0  0  0  0  0  0  0  0  0  0  0
    1.0580   -3.6022    0.0000 C   0  0  0  0  0  0  0  0  0  0  0  0
    2.5109   -2.2645    0.0000 C   0  0  0  0  0  0  0  0  0  0  0  0
    2.8123   -3.0324    0.0000 C   0  0  0  0  0  0  0  0  0  0  0  0
    2.2980   -3.6773    0.0000 C   0  0  0  0  0  0  0  0  0  0  0  0
   -2.8595    0.1402    0.0000 Si  0  0  0  0  0  0  0  0  0  0  0  0
   -3.6752    0.0172    0.0000 C   0  0  0  0  0  0  0  0  0  0  0  0
   -2.2146    0.6545    0.0000 C   0  0  0  0  0  0  0  0  0  0  0  0
   -2.9825    0.9559    0.0000 C   0  0  0  0  0  0  0  0  0  0  0  0
   -3.9766   -0.7507    0.0000 C   0  0  0  0  0  0  0  0  0  0  0  0
   -4.4909   -0.1057    0.0000 C   0  0  0  0  0  0  0  0  0  0  0  0
   -4.1896    0.6621    0.0000 C   0  0  0  0  0  0  0  0  0  0  0  0
   -2.3452   -0.5048    0.0000 O   0  0  0  0  0  0  0  0  0  0  0  0
    0.9200   -0.1143    0.0000 H   0  0  0  0  0  0  0  0  0  0  0  0
  1  2  1  0      
  2 21  1  0      
 21  3  1  0      
  3  4  1  0      
  4  5  1  0      
  5  1  1  0      
  2  6  1  0      
  6  7  1  0      
  7  8  2  0      
  8  9  1  0      
  9 10  1  0      
 10 21  1  0      
  2 11  1  6      
  9 11  1  6      
  1 12  1  6      
  3 25  1  6      
 12 13  2  0      
  9 14  1  0      
 14 33  1  0      
 15 16  1  0      
 16 17  1  0      
  5 17  1  1      
  4 15  1  6      
 16 18  1  0      
 16 19  1  0      
  6 20  1  1      
  7 48  1  0      
  6 22  1  6      
 22 23  1  0      
 23 24  2  0      
 25 32  1  0      
 26 27  2  0      
 27 28  1  0      
 28 29  2  0      
 29 30  1  0      
 30 31  2  0      
 26 31  1  0      
 26 32  1  0      
 33 34  1  0      
 34 35  1  0      
 34 36  1  0      
 34 37  1  0      
 35 38  1  0      
 35 39  1  0      
 35 40  1  0      
 41 42  1  0      
 41 43  1  0      
 41 44  1  0      
 42 45  1  0      
 42 46  1  0      
 42 47  1  0      
 41 48  1  0      
 21 49  1  1      
M  END
