# Supplementary material for: Gateway synthesis of daphnane congeners and their protein kinase C affinities and cell-growth activities
Source: Springer Nature journal article supplement (doi:10.1038/nchem.1074), 2011-06-17
Supplement: 41557_2011_BFnchem1074_MOESM68_ESM.mol [file 41557_2011_BFnchem1074_MOESM68_ESM.mol]

  ChemDraw06031119152D

 40 44  0  0  0  0  0  0  0  0999 V2000
   -1.6956    0.2532    0.0000 C   0  0  0  0  0  0  0  0  0  0  0  0
   -1.4669   -0.5424    0.0000 C   0  0  0  0  0  0  0  0  0  0  0  0
   -0.6396   -0.5708    0.0000 C   0  0  0  0  0  0  0  0  0  0  0  0
   -0.3570    0.2072    0.0000 C   0  0  0  0  0  0  0  0  0  0  0  0
   -1.0096    0.7165    0.0000 C   0  0  0  0  0  0  0  0  0  0  0  0
   -0.2076   -1.2769    0.0000 C   0  0  0  0  0  0  0  0  0  0  0  0
    0.6138   -1.3794    0.0000 C   0  0  0  0  0  0  0  0  0  0  0  0
    1.2061   -0.8010    0.0000 C   0  0  0  0  0  0  0  0  0  0  0  0
    0.4378    0.4356    0.0000 C   0  0  0  0  0  0  0  0  0  0  0  0
    1.8235    0.4096    0.0000 C   0  0  0  0  0  0  0  0  0  0  0  0
    1.8385    1.2097    0.0000 C   0  0  0  0  0  0  0  0  0  0  0  0
    1.1532    1.6227    0.0000 C   0  0  0  0  0  0  0  0  0  0  0  0
    0.4528    1.2357    0.0000 C   0  0  0  0  0  0  0  0  0  0  0  0
   -2.4710    0.5349    0.0000 C   0  0  0  0  0  0  0  0  0  0  0  0
   -1.0406   -1.2950    0.0000 O   0  0  0  0  0  0  0  0  0  0  0  0
   -0.2000    1.0171    0.0000 H   0  0  0  0  0  0  0  0  0  0  0  0
    0.4527   -0.3920    0.0000 O   0  0  0  0  0  0  0  0  0  0  0  0
    0.8770   -2.1612    0.0000 C   0  0  0  0  0  0  0  0  0  0  0  0
    2.5301   -0.0162    0.0000 O   0  0  0  0  0  0  0  0  0  0  0  0
   -0.2538    1.6615    0.0000 C   0  0  0  0  0  0  0  0  0  0  0  0
   -0.2687    2.4891    0.0000 I   0  0  0  0  0  0  0  0  0  0  0  0
    1.1686    2.4475    0.0000 O   0  0  0  0  0  0  0  0  0  0  0  0
   -0.6548   -1.9702    0.0000 O   0  0  0  0  0  0  0  0  0  0  0  0
    1.1232    0.0226    0.0000 C   0  0  0  0  0  0  0  0  0  0  0  0
    2.4456    1.6087    0.0000 C   0  0  0  0  0  0  0  0  0  0  0  0
    3.2577    1.4634    0.0000 C   0  0  0  0  0  0  0  0  0  0  0  0
    2.1654    2.3847    0.0000 C   0  0  0  0  0  0  0  0  0  0  0  0
    2.6381    0.9954    0.0000 O   0  0  0  0  0  0  0  0  0  0  0  0
    3.3068    0.2851    0.0000 C   0  0  0  0  0  0  0  0  0  0  0  0
    4.1087    0.1035    0.0000 O   0  0  0  0  0  0  0  0  0  0  0  0
    1.6830   -2.3237    0.0000 I   0  0  0  0  0  0  0  0  0  0  0  0
   -1.9745   -1.1928    0.0000 O   0  0  0  0  0  0  0  0  0  0  0  0
   -2.7887   -1.0789    0.0000 Si  0  0  0  0  0  0  0  0  0  0  0  0
   -3.2945   -1.7270    0.0000 C   0  0  0  0  0  0  0  0  0  0  0  0
   -2.6747   -0.2647    0.0000 C   0  0  0  0  0  0  0  0  0  0  0  0
   -3.4368   -0.5731    0.0000 C   0  0  0  0  0  0  0  0  0  0  0  0
   -2.9860   -2.4891    0.0000 C   0  0  0  0  0  0  0  0  0  0  0  0
   -3.8002   -2.3752    0.0000 C   0  0  0  0  0  0  0  0  0  0  0  0
   -4.1087   -1.6131    0.0000 C   0  0  0  0  0  0  0  0  0  0  0  0
    1.8648   -0.3387    0.0000 H   0  0  0  0  0  0  0  0  0  0  0  0
  1  2  1  0      
  2  3  1  0      
  3  4  1  0      
  4  5  1  0      
  5  1  1  0      
  3  6  1  0      
  6  7  1  0      
  7  8  1  0      
  8 24  1  0      
 24  9  1  0      
  9  4  1  0      
 24 10  1  0      
 10 11  1  0      
 11 12  1  0      
 12 13  1  0      
 13  9  1  0      
  1 14  1  1      
  3 15  1  1      
  4 16  1  6      
  9 17  1  6      
  7 18  1  0      
 10 19  1  6      
 13 20  1  6      
 20 21  1  0      
  2 32  1  1      
 12 22  1  1      
  7 17  1  6      
  6 23  1  1      
 11 25  1  1      
 25 26  1  0      
 25 27  2  0      
 11 28  1  6      
 28 29  1  0      
 19 29  1  0      
 29 30  2  0      
 18 31  1  0      
 32 33  1  0      
 33 34  1  0      
 33 35  1  0      
 33 36  1  0      
 34 37  1  0      
 34 38  1  0      
 34 39  1  0      
 24 40  1  1      
M  END
